# Supplementary material for: Global Food Demand Scenarios for the 21st Century
Source: PubMed Central journal article supplement (PMC4633131; doi:10.1371/journal.pone.0139201), 2015-11-04
Supplement: pone.0139201.s001.pdf [file pone.0139201.s001.pdf]

## Provision of programs and visualization tools

We provide a visualization tool and the open source code for our projections.

The open source R package "CalorieDemand" contains functions and input data of our approach which are described in help files and a manual. These can be used to create own scenario estimates for total and animal-based calorie demand. The package is written in the programming language R [1]. The website Demand Scenarios (<http://www.pik-potsdam.de/demand-scenarios>) provides information on the ongoing model development of the open source project and the web-based visualization tool. The open source model as used in this publication is archived at Food Demand Model ([https://github.com/bodirsky/Food\\_demand\\_model/releases/tag/1.0/](https://github.com/bodirsky/Food_demand_model/releases/tag/1.0/), doi:10.5281/zenodo.31008) and the visualisation tool under Visualization Tool ([https://github.com/bodirsky/Food\\_demand\\_visualisation\\_tool/releases/tag/1.0](https://github.com/bodirsky/Food_demand_visualisation_tool/releases/tag/1.0/)).

## References

- [1] R Development Core Team. R: A Language and Environment for Statistical Computing. ISBN 3-900051-07-0; 2012. [Www.R-project.org](http://www.R-project.org).
